# Supplementary material
Source: MDPI journal article supplement (https://www.mdpi.com/1424-2818/16/4/248)
Supplement: s1 [file s1]

## Supplementary file

### Full names of the genus and species level taxa mentioned in the article

*Anarta* Ochsenheimer, 1816  
*Atropolia* Varga, Ronkay & Ronkay, 2017  
*Calocestra* Beck, 1991  
*Cardepia* Hampson, 1905  
*Cardiestra* Boursin, 1963  
*Chersotis* Boisduval, 1840  
*Ctenoceratoda* Varga, 1992  
*Haderonia* Staudinger, 1896  
*Hadula* Staudinger, 1889  
*Metallopolia* Varga, Ronkay & Ronkay, 2018  
*Odontelia* Hampson, 1905  
*Pachetra* Guenée, 1841  
*Polia* Ochsenheimer, 1816  
*Protopolia* Varga, Ronkay & Ronkay, 2017  
*Thargelia* Püngeler, 1899  
*Tricheurois* Hampson, 1905  
*Trichoclea* Grote, 1883  
*Anarta (Calocestra) farnhami palaeartica* (Hacker, 1996)  
*Anarta (Calocestra) mendica* (Staudinger, 1895).  
*Anarta (Calocestra) schawyra* (Bang-Haas, 1927)  
*Anarta (Hadula) halodeserti* (Varga, 1973)  
*Anarta (Hadula) insolita* (Staudinger, 1889)  
*Anarta (Hadula) sabulorum* (Alphéraky, 1882)  
*Anarta (Trichoclea) trifolii* (Hufnagel, 1766)  
*Cardepia sociabilis deserticola* Rothschild, 1920  
*Cardiestra gobideserti* (Varga, 1973)  
*Ctenoceratoda sukharevae* (Varga, 1974)  
*Ctenoceratoda tancrei* (Graeser, 1892)  
*Erynnis perseus* (Scudder, 1863)  
*Haderonia arshanica* (Alphéraky, 1882)  
*Haderonia miserabilis* (Alphéraky, 1892)  
*Haderonia persimilis* (Draudt, 1950)  
*Odontelia arenicola* (Shchetkin, 1965)  
*Polia (Leuconephropolia) albirena* Draudt, 1950  
*Polia (Metallopolia) dysgnorima* Varga, Ronkay & Ronkay, 2018  
*Polia (Metallopolia) kalikotei* (Varga, 1992)  
*Polia (Metallopolia) kisculta* Varga, Ronkay & Ronkay, 2018  
*Polia (Metallopolia) metagnorima* Varga, Ronkay & Ronkay, 2018  
*Polia (Polia) atrax* Draudt, 1950  
*Polia (Polia) bombycina* (Hufnagel, 1766)  
*Polia (Polia) discalis* (Grote, 1870)  
*Polia (Polia) gigantea* Varga, Ronkay, Gyulai, Kiss & Ronkay, 2020  
*Polia (Polia) goliath* (Oberthür, 1880)  
*Polia (Polia) griseifusa* Draudt, 1950  
*Polia (Polia) hepatica* (Clerck, 1759)  
*Polia (Polia) imbrifera* (Guenée, 1852)

- 51 *Polia (Polia) lamuta* (Herz, 1903)  
52 *Polia (Polia) malchani* (Draudt, 1934)  
53 *Polia (Polia) nebulosa* (Hufnagel, 1766)  
54 *Polia (Polia) nimbosa* (Guenée, 1852)  
55 *Polia (Polia) nugatis* (Smith, 1898)  
56 *Polia (Polia) piniae* Buckett & Bauer, 1967  
57 *Polia (Polia) propodea* McCabe, 1980  
58 *Polia (Polia) purpurissata* (Grote, 1864)  
59 *Polia (Polia) richardsoni* (Curtis, 1835)  
60 *Polia (Polia) rogenhoferi* (Möschler, 1870)  
61 *Polia (Polia) serratilinea* (Treitschke, 1825)  
62 *Polia (Polia) subcontigua* (Eversmann, 1852)  
63 *Polia (Polia) tiefi* Püngeler, 1914  
64 *Polia (Polia) vespertilio* (Draudt, 1934)  
65 *Polia (Polia) vesperugo* Eversmann, 1856  
66 *Polia (Protopolia) praecipua* (Staudinger, 1895)  
67 *Thargelia distincta* (Christoph, 1884)  
68 *Thargelia gigantea* Rebel, 1909  
69 *Thargelia leucostigma* Varga & Ronkay, 1991  
70 *Tricheurois landryi* Varga, Ronkay, Gyulai, Kiss & Ronkay, 2020  
71 *Tricheurois retrusa* (Püngeler, 1906)  
72  
73
